# Supplementary material for: Comparative Genomics and Transcriptomics Analyses Reveal a Unique Environmental Adaptability of Vibrio fujianensis
Source: PubMed Central journal article supplement (PMC7232310; doi:10.3390/microorganisms8040555), 2020-04-13
Supplement: microorganisms-08-00555-s001.pdf [file microorganisms-08-00555-s001.pdf]

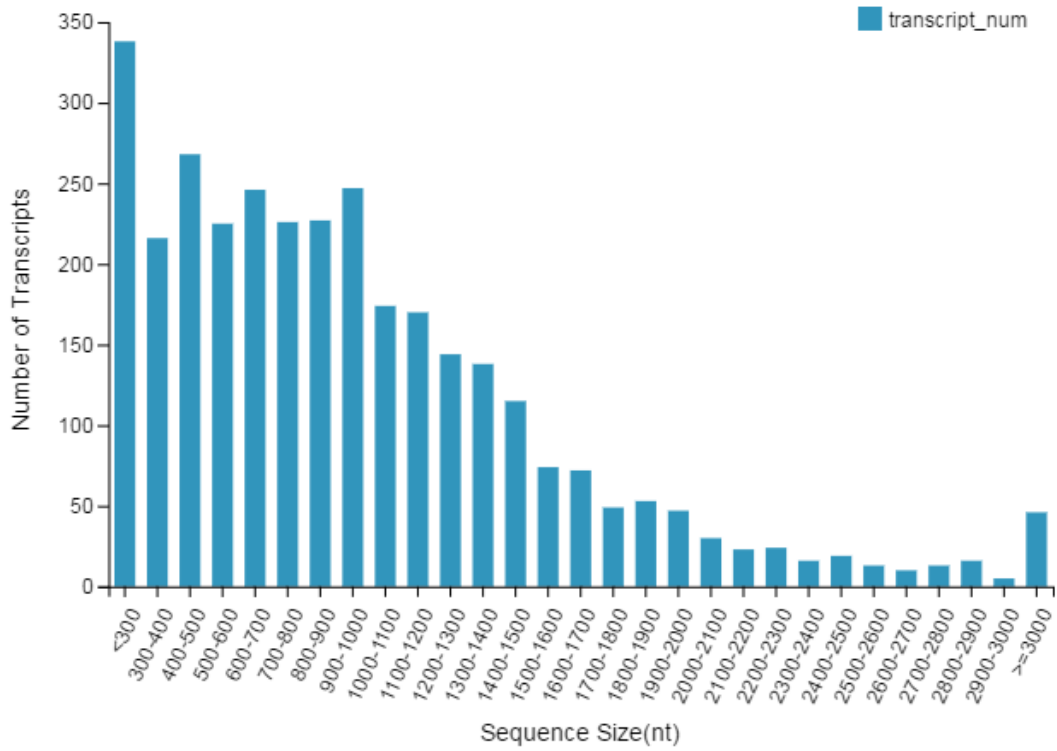

1

2 **Figure S1.** Sequence length distribution of *V. fujianensis* transcripts analyzed in this study.

3

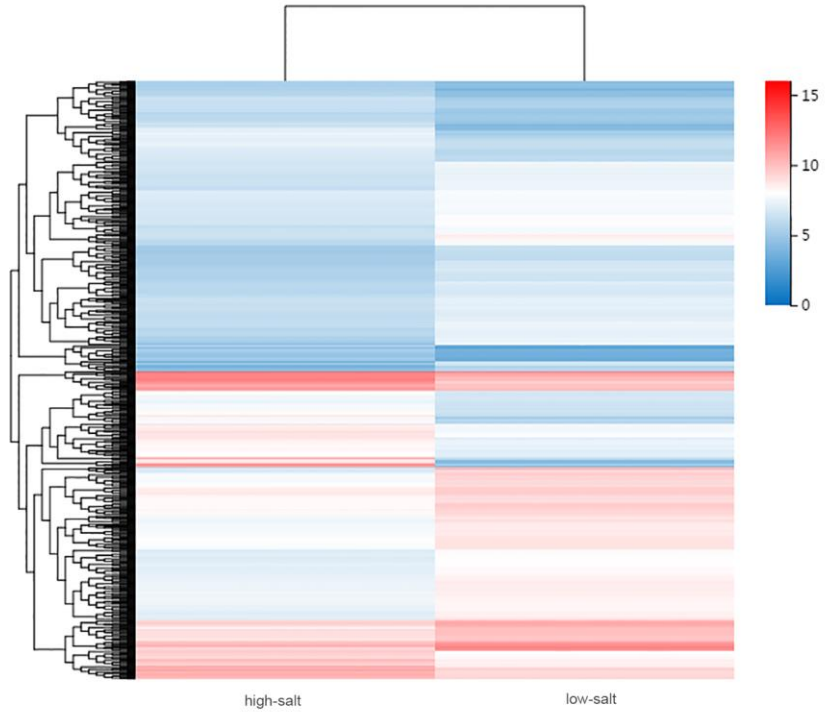

4

5 **Figure S2.** Differentially expressed genes (DEGs) cluster analysis of gene expression patterns  
 6 between the high-salt and low-salt condition. The red color indicates high relative expression,  
 7 and the blue color indicates low relative expression.

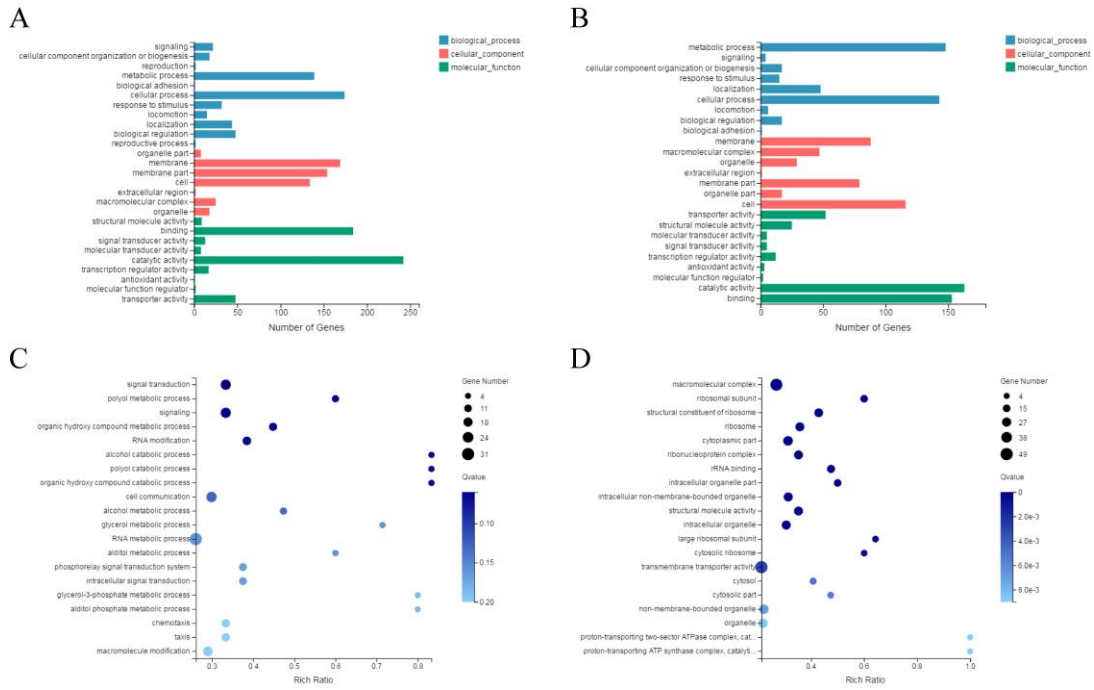

10 **Figure S3.** (A) Functional classification of gene ontology (GO) annotations of the  
 11 up-regulated differentially expressed genes (DEGs). (B) Functional classification of GO  
 12 annotations of the down-regulated DEGs. (C) Bubble charts of GO enrichment analysis of the  
 13 up-regulated DEGs. (D) Bubble charts of GO enrichment analysis of the down-regulated  
 14 DEGs. The x-axis corresponds to fold enrichment values while the y-axis indicates the top 20  
 15 GO enriched terms. Size of the bubble indicates the number of significant genes in the given  
 16 enriched term.

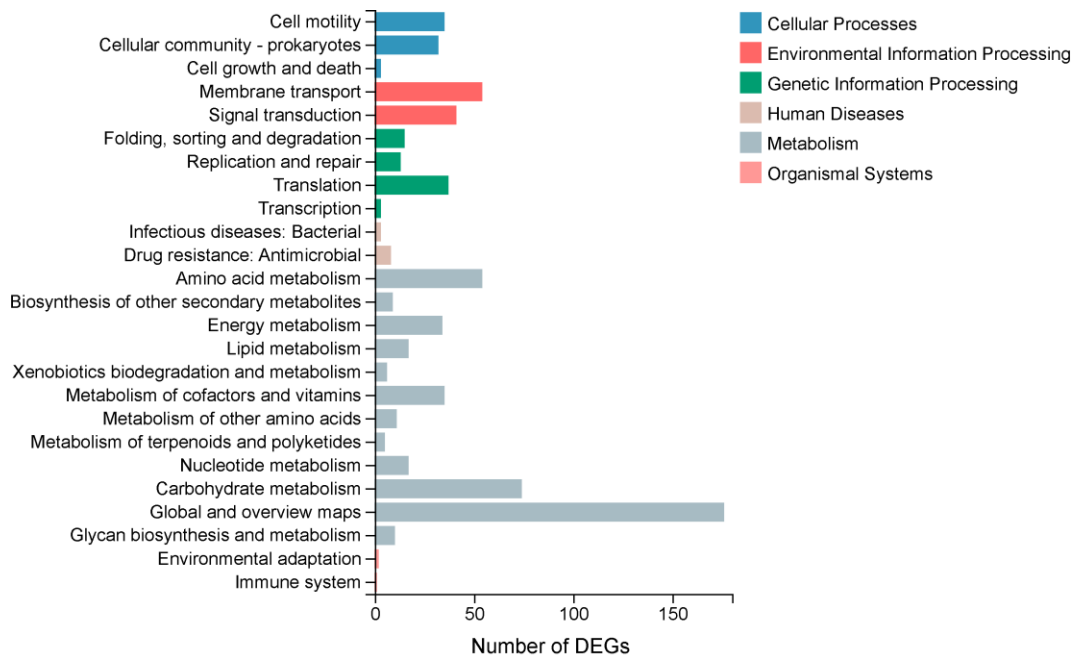

18

19 **Figure S4.** Functional classification of KEGG pathway of differentially expressed genes

20 (DEGs). The y-axis indicates the name of the KEGG metabolic pathways. The x-axis indicates

21 the number of the total DEGs annotated between high-salt and low-salt condition.

**Table S1. Overview of 16S rRNA gene sequences of *Vibrio* species analyzed in this study.**

| No. | Species                     | Strain                   | Isolation Region | Isolation Source                     | Isolation Year | 16S rRNA Accession |
|-----|-----------------------------|--------------------------|------------------|--------------------------------------|----------------|--------------------|
| 1   | <i>Vibrio aerogenes</i>     | ATCC 700797 <sup>T</sup> | China, Taiwan    | Seagrass bed sediment                | 1993           | AF124055           |
| 2   | <i>Vibrio aestivus</i>      | CECT 7558 <sup>T</sup>   | Spain            | Coastal seawater                     | 2008           | HE613734           |
| 3   | <i>Vibrio aestuarianus</i>  | ATCC 35048 <sup>T</sup>  | USA              | Oyster                               | -              | X74689             |
| 4   | <i>Vibrio agarivorans</i>   | CECT 5085 <sup>T</sup>   | Spain            | Seawater                             | 1996           | AJ310647           |
| 5   | <i>Vibrio albensis</i>      | ATCC 14547               | Elbe River       | Fish                                 | -              | EF032499           |
| 6   | <i>Vibrio alfacensis</i>    | CAIM 1831 <sup>T</sup>   | Spain            | Gill                                 | 2009           | JF316656           |
| 7   | <i>Vibrio alginolyticus</i> | ATCC 17749 <sup>T</sup>  | Japan            | Metamorphic horse mackerel           | -              | X56576             |
| 8   | <i>Vibrio algiovor</i>      | SA2 <sup>T</sup>         | Japan            | Turbo cornutus                       | 2013           | LC060680           |
| 9   | <i>Vibrio anguillarum</i>   | ATCC 19264 <sup>T</sup>  | Norge            | Sick squid                           | 1956           | X16895             |
| 10  | <i>Vibrio antiquarius</i>   | BV25Ex                   | USA              | Oyster                               | 2007           | AF319769           |
| 11  | <i>Vibrio aphrogenes</i>    | CA-1004 <sup>T</sup>     | Japan            | Seawater                             | 1994           | KX713151           |
| 12  | <i>Vibrio areninigrae</i>   | KCTC 22122 <sup>T</sup>  | South Korea      | Soesaggak Beach, black sand          | -              | EU143360           |
| 13  | <i>Vibrio artabrorum</i>    | LMG 23865 <sup>T</sup>   | Spain            | Ruditapes philippinarum              | 2005           | EF599164           |
| 14  | <i>Vibrio astriarenae</i>   | JCM 19233 <sup>T</sup>   | Japan            | Coral reef seawater                  | -              | KP342514           |
| 15  | <i>Vibrio atlanticus</i>    | CECT 7223 <sup>T</sup>   | Spain            | Ruditapes philippinarum              | 2005           | EF599163           |
| 16  | <i>Vibrio atypicus</i>      | HHS02 <sup>T</sup>       | China            | Penaeus chinensis                    | 2007           | FJ009624           |
| 17  | <i>Vibrio azureus</i>       | NBRC 104587 <sup>T</sup> | Japan            | Seawater                             | 2005           | AB428897           |
| 18  | <i>Vibrio barjaei</i>       | 3062 <sup>T</sup>        | Spain            | Ruditapes decussatus broodstock      | 2011           | LN867554           |
| 19  | <i>Vibrio bivalvicida</i>   | 605 <sup>T</sup>         | Spain            | Venerupis decussata                  | 2012           | HF568951           |
| 20  | <i>Vibrio brasiliensis</i>  | LMG 20546 <sup>T</sup>   | Brazil           | Scallop hatchery                     | 1999           | AJ316172           |
| 21  | <i>Vibrio breoganii</i>     | CECT 7222 <sup>T</sup>   | Spain            | Ruditapes decussatus                 | 2004/2005      | EF599161           |
| 22  | <i>Vibrio campbellii</i>    | ATCC 25920 <sup>T</sup>  | USA              | Seawater                             | 1971           | X56575             |
| 23  | <i>Vibrio caribbeanicus</i> | DSM 23640 <sup>T</sup>   | Netherlands      | Scleritoderma cyanea (marine sponge) | 2005           | GU223601           |

|    |                               |                         |              |                                        |           |          |
|----|-------------------------------|-------------------------|--------------|----------------------------------------|-----------|----------|
| 24 | <i>Vibrio casei</i>           | WS 4539 <sup>T</sup>    | Germany      | Surface of French smear ripened cheese | 2010      | FJ968722 |
| 25 | <i>Vibrio celticus</i>        | LMG 23850 <sup>T</sup>  | Spain        | Ruditapes decussatus                   | 2004      | EF599162 |
| 26 | <i>Vibrio chagasii</i>        | LMG 21353 <sup>T</sup>  | Norge        | Gut of fish                            | 1997      | AJ316199 |
| 27 | <i>Vibrio cholerae</i>        | CECT 514 <sup>T</sup>   | Asia         | Cholera patient                        | -         | X76337   |
| 28 | <i>Vibrio cidicii</i>         | 2756-81 <sup>T</sup>    | -            | River water                            | 1981      | KJ807108 |
| 29 | <i>Vibrio cincinnatiensis</i> | NCTC 12012 <sup>T</sup> | USA          | Patient                                | -         | X74698   |
| 30 | <i>Vibrio comitans</i>        | GHG2-1 <sup>T</sup>     | Japan        | Gut of abalone                         | 2005      | DQ922915 |
| 31 | <i>Vibrio coralliilyticus</i> | LMG 20984 <sup>T</sup>  | Indian Ocean | Coral                                  | 1999      | AJ440005 |
| 32 | <i>Vibrio cortegadensis</i>   | LMG 27474 <sup>T</sup>  | Spain        | Venerupis decussata                    | 2004/2005 | HF955040 |
| 33 | <i>Vibrio crassostreae</i>    | LGP 7 <sup>T</sup>      | France       | Atlantic coast                         | 2001      | EF094887 |
| 34 | <i>Vibrio crosai</i>          | CAIM 1437 <sup>T</sup>  | Mexico       | Crassostrea gigas (oyster)             | 2003      | JQ434120 |
| 35 | <i>Vibrio cyclitrophicus</i>  | P-2P44 <sup>T</sup>     | USA          | Seabed sediment                        | -         | AM162656 |
| 36 | <i>Vibrio diabolicus</i>      | LMG 19805 <sup>T</sup>  | East Pacific | Pompeii worm                           | 1999      | X99762   |
| 37 | <i>Vibrio diazotrophicus</i>  | ATCC 33466 <sup>T</sup> | Canada       | Gut of sea urchin                      | 1981      | X74701   |
| 38 | <i>Vibrio europaeus</i>       | PP-638 <sup>T</sup>     | Spain        | Shellfish hatchery                     | 2001      | AY792622 |
| 39 | <i>Vibrio ezurae</i>          | LMG 19970 <sup>T</sup>  | Japan        | Gut of abalone                         | 1999      | AY426980 |
| 40 | <i>Vibrio fluvialis</i>       | ATCC 33809 <sup>T</sup> | Bangladesh   | Patient                                | 1976      | X74703   |
| 41 | <i>Vibrio fortis</i>          | CAIM 629 <sup>T</sup>   | Ecuador      | Vannamei larva                         | 1996      | AJ514916 |
| 42 | <i>Vibrio fujianensis</i>     | FJ201301 <sup>T</sup>   | China        | Aquaculture water                      | 2013      | KY951464 |
| 43 | <i>Vibrio furnissii</i>       | ATCC 35016 <sup>T</sup> | Japan        | Human feces                            | 1969      | X76336   |
| 44 | <i>Vibrio galathea</i>        | S2757 <sup>T</sup>      | Australia    | Mussel                                 | 2007      | FJ457478 |
| 45 | <i>Vibrio gallaecicus</i>     | CECT 7244 <sup>T</sup>  | Spain        | Ruditapes philippinarum                | 2004/2005 | EU541605 |
| 46 | <i>Vibrio gallicus</i>        | CIP 107863              | France       | Abalone                                | 2001      | AY257972 |
| 47 | <i>Vibrio gazogenes</i>       | ATCC 29988 <sup>T</sup> | USA          | Saltwater marsh                        | 1978      | X74705   |
| 48 | <i>Vibrio gigantis</i>        | LGP 13 <sup>T</sup>     | France       | Cultured oysters                       | 2005      | EF094888 |
| 49 | <i>Vibrio haliotocoli</i>     | IAM 14596 <sup>T</sup>  | Japan        | Gut of abalone                         | 1991      | AB000390 |

|    |                             |                          |             |                                              |      |          |
|----|-----------------------------|--------------------------|-------------|----------------------------------------------|------|----------|
| 50 | <i>Vibrio hangzhouensis</i> | cn83 <sup>T</sup>        | China       | Seabed sediment                              | -    | EU082035 |
| 51 | <i>Vibrio harveyi</i>       | NCIMB1280 <sup>T</sup>   | USA         | Dead amphip                                  | 1935 | AY750575 |
| 52 | <i>Vibrio hemicentroti</i>  | AlyHP32                  | South Korea | Gut of Hemicentrotus pulcherrimus            | 2011 | JX204734 |
| 53 | <i>Vibrio hepatarius</i>    | LMG 20362 <sup>T</sup>   | Ecuador     | Litopenaeus vannamei                         | 1996 | AJ345063 |
| 54 | <i>Vibrio hippocampi</i>    | BFLP-4 <sup>T</sup>      | Spain       | Intestinal content of Hippocampus guttulatus | -    | FN421434 |
| 55 | <i>Vibrio hispanicus</i>    | LMG 13240 <sup>T</sup>   | Spain       | Artemia sp.                                  | 1991 | AY254039 |
| 56 | <i>Vibrio hyugaensis</i>    | 090810a <sup>T</sup>     | Japan       | Seawater                                     | 2010 | LC004912 |
| 57 | <i>Vibrio ichthyenteri</i>  | ATCC 700023 <sup>T</sup> | Japan       | Intestine of japanese flounder larvae        | -    | AJ421445 |
| 58 | <i>Vibrio inhibens</i>      | BFLP-10 <sup>T</sup>     | Japan       | Hippocampus guttulatus                       | -    | FN687911 |
| 59 | <i>Vibrio injenensis</i>    | KCTC 32233 <sup>T</sup>  | South Korea | Human blood                                  | 2015 | KC634073 |
| 60 | <i>Vibrio inusitatus</i>    | RW14 <sup>T</sup>        | USA         | Gut of abalone                               | 2005 | DQ922920 |
| 61 | <i>Vibrio ishigakensis</i>  | JCM 19231 <sup>T</sup>   | Japan       | Seawater                                     | -    | KP790249 |
| 62 | <i>Vibrio jasicida</i>      | CAIM 1864 <sup>T</sup>   | New Zealand | Haemolymph of Rock lobster                   | 1999 | AB562589 |
| 63 | <i>Vibrio kanaloae</i>      | LMG 20539 <sup>T</sup>   | France      | Oyster larva                                 | 1998 | AM162657 |
| 64 | <i>Vibrio lentus</i>        | CECT 5110 <sup>T</sup>   | Spain       | Oyster                                       | -    | AJ278881 |
| 65 | <i>Vibrio littoralis</i>    | DSM 17657 <sup>T</sup>   | South Korea | Coastal seawater                             | -    | DQ097523 |
| 66 | <i>Vibrio madracius</i>     | A-354 <sup>T</sup>       | Brazil      | Coral                                        | -    | KC751062 |
| 67 | <i>Vibrio mangrovi</i>      | MSSRF38 <sup>T</sup>     | India       | mangrove-associated wild rice                | 2009 | EU144014 |
| 68 | <i>Vibrio marisflavi</i>    | CECT 7928 <sup>T</sup>   | China       | Seawater                                     | 2008 | FJ847833 |
| 69 | <i>Vibrio maritimus</i>     | R-40493 <sup>T</sup>     | Brazil      | Coral                                        | 2005 | GU929925 |
| 70 | <i>Vibrio mediterranei</i>  | 50 <sup>T</sup>          | Spain       | Seawater                                     | -    | X74710   |
| 71 | <i>Vibrio metoecus</i>      | OP3H <sup>T</sup>        | USA         | Saline pond                                  | 2006 | KJ647312 |
| 72 | <i>Vibrio metschnikovii</i> | JCM 21189 <sup>T</sup>   | Asia        | Sick poultry                                 | 1888 | X74711   |
| 73 | <i>Vibrio mexicanus</i>     | CAIM 1540 <sup>T</sup>   | Mexico      | Oyster                                       | 2004 | JQ434105 |
| 74 | <i>Vibrio mimicus</i>       | ATCC 33653 <sup>T</sup>  | USA         | Patient's ear                                | -    | X74713   |
| 75 | <i>Vibrio mytili</i>        | CECT 632 <sup>T</sup>    | Spain       | Mussel                                       | 1985 | X99761   |

|     |                                |                         |                          |                                   |      |          |
|-----|--------------------------------|-------------------------|--------------------------|-----------------------------------|------|----------|
| 76  | <i>Vibrio natriegens</i>       | NBRC 15636 <sup>T</sup> | USA                      | Saltwater marsh                   | -    | X74714   |
| 77  | <i>Vibrio navarrensis</i>      | CIP 103381 <sup>T</sup> | Spain                    | Sewage                            | 1982 | X74715   |
| 78  | <i>Vibrio neonatus</i>         | HDD3-1 <sup>T</sup>     | Japan                    | Gut of Japanese abalones          | 1999 | AY426979 |
| 79  | <i>Vibrio neptunius</i>        | LMG 20536               | Brazil                   | Scallop hatchery                  | 1998 | AJ316171 |
| 80  | <i>Vibrio nereis</i>           | ATCC 25917 <sup>T</sup> | USA                      | Seawater                          | -    | X74716   |
| 81  | <i>Vibrio nigripulchritudo</i> | ATCC 27043 <sup>T</sup> | USA                      | Seawater                          | -    | X74717   |
| 82  | <i>Vibrio ordalii</i>          | ATCC 33509 <sup>T</sup> | USA                      | Oncorhynchus kisutch              | 1973 | X74718   |
| 83  | <i>Vibrio orientalis</i>       | ATCC 33934 <sup>T</sup> | China                    | Seawater                          | -    | X74719   |
| 84  | <i>Vibrio ostreicida</i>       | PP-203 <sup>T</sup>     | Spain                    | Ostrea edulis                     | -    | AJ296159 |
| 85  | <i>Vibrio owensii</i>          | CAIM 1854 <sup>T</sup>  | Australia                | Diseased larvae                   | 2007 | GU018180 |
| 86  | <i>Vibrio pacinii</i>          | LMG 19999 <sup>T</sup>  | China                    | Chinese shrimp                    | 1996 | AJ316194 |
| 87  | <i>Vibrio pacinii</i>          | MSSRF3 <sup>T</sup>     | India                    | Mangrove-associated wild rice     | 2006 | DQ847123 |
| 88  | <i>Vibrio palustris</i>        | EAod9 <sup>T</sup>      | Spain                    | Arthrocnemum macrostachyum        | 2014 | KU320862 |
| 89  | <i>Vibrio panuliri</i>         | LBS2 <sup>T</sup>       | Indian Ocean,<br>Andaman | Panuliruspeniciliatus             | 2012 | KF487035 |
| 90  | <i>Vibrio parahaemolyticus</i> | ATCC 17802 <sup>T</sup> | Japan                    | Patient                           | 1950 | AF388386 |
| 91  | <i>Vibrio pectenicida</i>      | A365 <sup>T</sup>       | France                   | Pecten maximus                    | 1991 | Y13830   |
| 92  | <i>Vibrio penaeicida</i>       | DSM 14398 <sup>T</sup>  | Japan                    | Penaeus japonicus (Kuruma shrimp) | 1994 | AJ421444 |
| 93  | <i>Vibrio ponticus</i>         | CECT 5869 <sup>T</sup>  | Spain                    | Cultured mussel                   | 1986 | AJ630103 |
| 94  | <i>Vibrio porteresiae</i>      | DSM 19223 <sup>T</sup>  | India                    | Porteresia coarctata              | 2006 | EF488079 |
| 95  | <i>Vibrio proteolyticus</i>    | ATCC 15338 <sup>T</sup> | USA                      | Intestinal content of louse       | -    | X74723   |
| 96  | <i>Vibrio quintilis</i>        | CECT 7734 <sup>T</sup>  | Spain                    | Coastal seawater                  | 2008 | HE613736 |
| 97  | <i>Vibrio renipiscarius</i>    | CECT 8603 <sup>T</sup>  | Spain                    | Sparus aurata                     | 2000 | HG931125 |
| 98  | <i>Vibrio rotiferianus</i>     | CAIM 577 <sup>T</sup>   | Belgium                  | Rotifer from water                | 1999 | AJ316187 |
| 99  | <i>Vibrio ruber</i>            | VR1 <sup>T</sup>        | China, Taiwan            | Seawater                          | 2011 | AF462458 |
| 100 | <i>Vibrio rumoiensis</i>       | S-1 <sup>T</sup>        | Japan                    | waste water                       | 1999 | AB013297 |

|     |                                          |                          |                   |                               |      |          |
|-----|------------------------------------------|--------------------------|-------------------|-------------------------------|------|----------|
| 101 | <i>Vibrio sagamiensis</i>                | NBRC 104589 <sup>T</sup> | Japan             | Seawater                      | 2005 | AB428909 |
| 102 | <i>Vibrio salilacus</i>                  | DSG-S6 <sup>T</sup>      | China             | Saltwater lake                | 2013 | KP234045 |
| 103 | <i>Vibrio scopthalmi</i>                 | LMG 19158 <sup>T</sup>   | Spain             | Scophthalmus maximus          | 1990 | HM771340 |
| 104 | <i>Vibrio sinaloensis</i>                | CAIM 797 <sup>T</sup>    | Mexico            | Spotted rose snapper spleen   | 2003 | DQ451211 |
| 105 | <i>Vibrio sonorensis</i>                 | CAIM 1076 <sup>T</sup>   | Mexico            | Crassostrea gigas             | 2003 | KT732014 |
| 106 | <i>Vibrio spartinae</i>                  | SMJ21 <sup>T</sup>       | Spain             | Heavy metal polluted estuary  | 2013 | KX583607 |
| 107 | <i>Vibrio splendidus</i>                 | LMG 4042 <sup>T</sup>    | -                 | Fish                          | -    | AJ515230 |
| 108 | <i>Vibrio superstes</i>                  | G3-29 <sup>T</sup>       | Australia         | Abalone                       | 2000 | AY155585 |
| 109 | <i>Vibrio tapetis subsp. britannicus</i> | CETE 8161 <sup>T</sup>   | UK                | Hippoglossus hippoglossus     | 2001 | HE795148 |
| 110 | <i>Vibrio tapetis subsp. tapetis</i>     | CECT4600 <sup>T</sup>    | France            | Venerupis philippinarum       | 1990 | Y08430   |
| 111 | <i>Vibrio tasmaniensis</i>               | LMG 20012 <sup>T</sup>   | Australia         | Fish                          | -    | AJ316192 |
| 112 | <i>Vibrio thalassae</i>                  | CECT 8203 <sup>T</sup>   | Mediterranean Sea | Seawater                      | 2008 | HF541973 |
| 113 | <i>Vibrio toranzoniae</i>                | CECT 7225 <sup>T</sup>   | Spain             | Clams of Ruditapes decussatus | 2004 | HE978310 |
| 114 | <i>Vibrio tritonius</i>                  | AM2 <sup>T</sup>         | Japan             | Gut of marine invertebrate    | 2008 | GU951698 |
| 115 | <i>Vibrio tubiashii</i>                  | ATCC 19109 <sup>T</sup>  | USA               | Clams                         | 1965 | X74725   |
| 116 | <i>Vibrio variabilis</i>                 | R-40492 <sup>T</sup>     | Brazil            | Mucus                         | 2005 | GU929924 |
| 117 | <i>Vibrio vulnificus</i>                 | ATCC 27562 <sup>T</sup>  | USA               | Human blood                   | 1979 | X76333   |
| 118 | <i>Vibrio xiamenensis</i>                | G21 <sup>T</sup>         | China             | Soil                          | 2007 | GQ397859 |
| 119 | <i>Vibrio xuii</i>                       | DSM 17185 <sup>T</sup>   | China             | Shrimp culture water          | 1995 | AJ316181 |
| 120 | <i>Aeromonas hydrophila</i>              | ATCC 7966 <sup>T</sup>   | -                 | -                             | -    | AY264937 |

22

23

24



**Table S2: Genomic overview of *Vibrio* species analyzed in this study**

| No. | Species                        | Strain                                    | Genome Size | GC content (%) | Isolation Region | Isolation Year | Accession Number |
|-----|--------------------------------|-------------------------------------------|-------------|----------------|------------------|----------------|------------------|
| 1   | <i>Vibrio anguillarum</i>      | NCTC 12159 <sup>T</sup>                   | 4.42        | 44.40          | USA              | 1900/1988      | PRJEB6403        |
| 2   | <i>Vibrio bivalvicida</i>      | 605 <sup>T</sup>                          | 4.92        | 44.30          | Spain            | 2012           | PRJNA297724      |
| 3   | <i>Vibrio cholerae</i>         | O1 biovar El Tor str. N16961 <sup>T</sup> | 4.03        | 47.49          | Bangladesh       | 1971           | PRJNA36          |
| 4   | <i>Vibrio cholerae</i>         | O139 serovar MO45                         | 4.02        | 47.50          | India            | 1992           | PRJNA242443      |
| 5   | <i>Vibrio cincinnatiensis</i>  | NCTC 12012 <sup>T</sup>                   | 3.67        | 43.70          | USA              | -              | PRJEB19569       |
| 6   | <i>Vibrio diazotrophicus</i>   | NBRC 103148 <sup>T</sup>                  | 4.72        | 43.40          | Canada           | -              | PRJDB1326        |
| 7   | <i>Vibrio europaeus</i>        | PP-638 <sup>T</sup>                       | 5.47        | 44.99          | Spain            | 2001           | PRJNA312891      |
| 8   | <i>Vibrio fujianensis</i>      | FJ201301 <sup>T</sup>                     | 3.62        | 43.40          | China            | 2013           | PRJNA381276      |
| 9   | <i>Vibrio hyugaensis</i>       | 090810a <sup>T</sup>                      | 5.61        | 44.99          | Japan            | 2010           | PRJNA429390      |
| 10  | <i>Vibrio injenensis</i>       | KCTC 32233 <sup>T</sup>                   | 3.67        | 44.00          | South Korea      | 2015           | PRJDB5318        |
| 11  | <i>Vibrio jasicida</i>         | CECT 7692 <sup>T</sup>                    | 5.99        | 45.10          | -                | -              | PRJNA427410      |
| 12  | <i>Vibrio metschnikovii</i>    | JCM 21189 <sup>T</sup>                    | 3.75        | 44.19          | -                | 1888           | PRJNA40493       |
| 13  | <i>Vibrio owensii</i>          | CAIM 1854 <sup>T</sup>                    | 6.35        | 43.90          | Australia        | 2007           | PRJNA189697      |
| 14  | <i>Vibrio pacinii</i>          | DSM 19139 <sup>T</sup>                    | 4.30        | 45.20          | China            | -              | PRJNA234841      |
| 15  | <i>Vibrio parahaemolyticus</i> | RIMD 2210633 <sup>T</sup>                 | 5.15        | 45.40          | Japan            | 1950           | PRJNA233509      |
| 16  | <i>Vibrio salilacus</i>        | DSG-S6 <sup>T</sup>                       | 3.62        | 45.10          | China            | 2013           | PRJNA390014      |
| 17  | <i>Vibrio vulnificus</i>       | ATCC 27562 <sup>T</sup>                   | 5.01        | 46.71          | USA              | 1979           | PRJNA295776      |

Table S3. Virulence-associated factors profile of *V. fujianensis* and other pathogenic *Vibrio* species.

| VF class  | Virulence factors                                       | Related genes           | A           | B | C | D | E | F | G | H | I | J | K | L |   |   |
|-----------|---------------------------------------------------------|-------------------------|-------------|---|---|---|---|---|---|---|---|---|---|---|---|---|
| Adherence | Accessory colonization factor                           | <i>acfA</i>             | -           | - | - | - | - | - | - | + | - | - | - | - |   |   |
|           |                                                         | <i>acfB</i>             | +           | - | - | - | - | - | - | + | + | - | - | + |   |   |
|           |                                                         | <i>acfC</i>             | -           | - | - | - | - | - | - | - | + | + | - | - | - |   |
|           |                                                         | <i>acfD</i>             | -           | - | - | - | - | - | - | - | + | + | - | - | - |   |
|           | Mannose-sensitive hemagglutinin<br>(MSHA type IV pilus) | <i>mshA</i>             | +           | + | + | - | - | + | - | + | + | - | - | + | + |   |
|           |                                                         | <i>mshB</i>             | -           | + | + | - | + | + | + | + | + | + | - | + | + |   |
|           |                                                         | <i>mshC</i>             | +           | + | + | - | - | + | + | + | + | + | - | + | + |   |
|           |                                                         | <i>mshD</i>             | +           | + | + | - | + | - | + | + | + | + | - | + | + |   |
|           |                                                         | <i>mshE</i>             | +           | + | + | + | + | + | + | + | + | + | + | + | + |   |
|           |                                                         | <i>mshF</i>             | -           | + | + | - | - | - | - | + | + | + | - | + | - |   |
|           |                                                         | <i>mshG</i>             | +           | + | + | + | + | + | + | + | + | + | + | + | + |   |
|           |                                                         | <i>mshH</i>             | +           | + | + | + | + | + | + | + | + | + | + | + | + |   |
|           |                                                         | <i>mshI</i>             | +           | + | + | + | - | + | + | + | + | + | + | + | + |   |
|           |                                                         | <i>mshJ</i>             | -           | + | + | + | + | + | + | + | + | + | + | + | + |   |
|           |                                                         | <i>mshK</i>             | -           | + | + | - | - | + | + | + | + | + | - | + | - |   |
|           |                                                         | <i>mshL</i>             | +           | + | + | + | + | + | + | + | + | + | + | + | + |   |
|           |                                                         | <i>mshM</i>             | +           | + | + | + | + | + | + | + | + | + | + | + | + |   |
|           |                                                         | <i>mshN</i>             | -           | + | + | + | - | + | + | + | + | + | - | + | - |   |
|           |                                                         | Toxin-coregulated pilus | <i>tcpA</i> | - | - | - | - | - | - | - | - | + | + | - | - | - |

|                  |                  |   |   |   |   |   |   |   |   |   |   |   |   |   |
|------------------|------------------|---|---|---|---|---|---|---|---|---|---|---|---|---|
| (type IVB pilus) | <i>tcpB</i>      | - | - | - | - | - | - | - | - | + | + | - | - | - |
|                  | <i>tcpC</i>      | - | - | - | - | - | - | - | - | + | + | - | - | - |
|                  | <i>tcpD</i>      | - | - | - | - | - | - | - | - | + | + | - | - | - |
|                  | <i>tcpE</i>      | - | - | - | - | - | - | - | - | + | + | - | - | - |
|                  | <i>tcpF</i>      | - | - | - | - | - | - | - | - | + | + | - | - | - |
|                  | <i>tcpH</i>      | - | - | - | - | - | - | - | - | + | + | - | - | - |
|                  | <i>tcpI</i>      | - | - | - | - | - | - | - | - | + | + | - | - | - |
|                  | <i>tcpJ</i>      | - | - | - | - | - | - | - | - | + | + | - | - | - |
|                  | <i>tcpN/toxT</i> | - | - | - | - | - | - | - | - | + | + | - | - | - |
|                  | <i>tcpP</i>      | - | - | - | - | - | - | - | - | + | + | - | - | - |
|                  | <i>tcpQ</i>      | - | - | - | - | - | - | - | - | + | + | - | - | - |
|                  | <i>tcpR</i>      | - | - | - | - | - | - | - | - | + | + | - | - | - |
|                  | <i>tcpS</i>      | - | - | - | - | - | - | - | - | + | + | - | - | - |
|                  | <i>tcpT</i>      | - | - | - | - | - | - | - | - | + | + | - | - | - |
|                  | <i>pilA</i>      | + | - | + | - | + | - | + | + | + | + | - | + | - |
| Type IV pilus    | <i>pilB</i>      | + | + | + | + | + | + | + | + | + | + | + | + | + |
|                  | <i>pilC</i>      | + | + | + | + | + | + | + | + | + | + | + | + | + |
|                  | <i>pilD</i>      | + | + | + | + | + | + | + | + | + | + | + | + | + |
|                  | <i>wbpE</i>      | - | - | - | - | - | - | - | - | - | - | + | - | - |
|                  | <i>wbpG</i>      | - | - | - | - | - | - | - | - | - | - | + | - | - |
| LPS O-antigen    | <i>wbpH</i>      | - | - | - | - | - | - | - | - | - | - | + | - | - |
|                  | <i>wbpI</i>      | - | - | - | - | - | - | - | - | - | - | + | - | - |
|                  | Undetermined     | - | - | - | - | + | - | - | - | - | - | - | - | - |
|                  | Undetermined     | + | - | - | + | - | - | + | - | + | - | - | - | - |
| Flp type IV pili | <i>flpF</i>      | - | - | - | - | - | + | + | - | - | - | - | - | + |
| The tad locus    | <i>tadA</i>      | + | - | - | - | - | - | - | - | - | - | - | - | + |

|                  |                         |                  |   |   |   |   |   |   |   |   |   |   |   |   |   |   |
|------------------|-------------------------|------------------|---|---|---|---|---|---|---|---|---|---|---|---|---|---|
|                  | Lateral flagella        | <i>flgI</i>      | - | - | - | - | - | - | + | - | - | - | - | - | - |   |
|                  |                         | <i>lfgH</i>      | - | - | - | - | - | - | + | - | - | - | - | - | - |   |
|                  |                         | <i>lfnA</i>      | - | - | - | - | - | - | + | - | - | - | - | - | - |   |
|                  | Polar flagella          | <i>nueB</i>      | - | + | - | - | - | - | - | - | - | - | - | - | - |   |
|                  | Curli fibers            | <i>csgG</i>      | - | - | - | - | - | - | + | + | - | - | - | - | - |   |
| Antiphagocytosis | Capsular polysaccharide | <i>cpsA</i>      | - | + | + | + | - | - | - | - | + | + | + | + | - |   |
|                  |                         | <i>cpsB</i>      | - | + | + | + | - | - | - | - | - | + | + | + | + | - |
|                  |                         | <i>cpsC</i>      | - | + | + | - | - | - | - | - | - | + | + | - | + | - |
|                  |                         | <i>cpsD</i>      | - | + | + | + | - | - | - | - | - | + | + | + | + | - |
|                  |                         | <i>cpsE</i>      | - | - | + | - | - | - | - | - | - | - | - | - | + | - |
|                  |                         | <i>cpsF</i>      | - | + | + | + | - | - | - | - | - | + | + | + | + | - |
|                  |                         | <i>cpsG</i>      | - | - | + | - | - | - | - | - | - | - | - | - | + | - |
|                  |                         | <i>cpsH</i>      | - | + | + | - | - | - | - | - | - | - | - | - | + | - |
|                  |                         | <i>cpsI</i>      | - | + | + | - | - | - | - | - | - | - | - | - | + | - |
|                  |                         | <i>cpsJ</i>      | - | + | + | - | - | - | - | - | - | - | - | - | + | - |
|                  |                         | <i>rmlA</i>      | - | - | - | - | + | - | - | - | - | - | - | - | - | - |
|                  |                         | <i>rmlC</i>      | - | + | - | - | - | - | - | - | - | - | - | - | - | - |
|                  |                         | <i>rmlD</i>      | - | + | - | - | - | - | - | + | - | - | - | - | - | - |
|                  |                         | <i>wbfB</i>      | - | - | - | + | - | - | - | - | - | - | + | + | - | - |
|                  |                         | <i>wbfT</i>      | + | - | - | - | - | - | - | - | - | - | - | - | - | - |
|                  |                         | <i>wbfU</i>      | + | - | - | - | + | - | - | - | + | + | - | - | - | - |
|                  |                         | <i>wbfV/wcvB</i> | + | + | + | + | + | + | + | + | + | + | + | - | + | + |
|                  |                         | <i>wbfY</i>      | + | - | + | - | + | - | - | - | + | + | - | - | - | + |
|                  |                         | <i>wbjD/wecB</i> | - | - | - | + | - | - | - | - | - | + | + | + | + | - |
|                  |                         | <i>wecA</i>      | - | + | - | - | - | - | + | + | - | - | - | - | + | - |
| <i>wecC</i>      | -                       | -                | - | + | - | - | - | - | - | + | + | + | + | - |   |   |

|                         |          |             |   |   |   |   |   |   |   |   |   |   |   |   |   |
|-------------------------|----------|-------------|---|---|---|---|---|---|---|---|---|---|---|---|---|
|                         |          | <i>wza</i>  | - | + | + | + | - | + | + | - | - | - | + | - |   |
|                         |          | <i>wzb</i>  | - | + | - | - | - | + | - | - | - | - | + | - |   |
|                         |          | <i>wzc</i>  | - | + | + | + | - | + | + | - | - | - | + | - |   |
|                         | Capsule  | <i>uge</i>  | - | - | - | - | - | + | + | - | - | - | - | - |   |
| Chemotaxis and motility | Flagella | <i>cheA</i> | + | + | + | + | + | + | + | + | + | + | + | + |   |
|                         |          | <i>cheB</i> | + | + | + | + | + | + | + | + | + | + | + | + | + |
|                         |          | <i>cheR</i> | + | + | + | + | + | + | + | + | + | + | + | + | + |
|                         |          | <i>cheV</i> | + | + | + | + | - | + | + | + | + | + | + | + | + |
|                         |          | <i>cheW</i> | + | + | + | - | + | + | + | + | + | + | - | + | + |
|                         |          | <i>cheY</i> | + | + | + | - | + | + | + | + | + | + | + | + | + |
|                         |          | <i>cheZ</i> | + | + | + | + | + | + | + | + | + | + | + | + | + |
|                         |          | <i>filM</i> | + | + | + | + | + | + | + | + | + | + | + | + | + |
|                         |          | <i>flaA</i> | + | + | + | + | + | + | + | + | + | + | + | + | + |
|                         |          | <i>flaB</i> | + | + | + | + | + | + | + | + | + | + | + | + | + |
|                         |          | <i>flaC</i> | - | - | - | + | - | + | + | + | + | + | + | - | - |
|                         |          | <i>flaD</i> | + | + | + | + | + | + | + | + | + | + | + | + | + |
|                         |          | <i>flaE</i> | + | + | + | + | + | + | + | + | + | + | + | + | + |
|                         |          | <i>flaG</i> | + | + | + | - | + | + | + | + | + | + | - | + | + |
|                         |          | <i>flaI</i> | + | + | + | - | + | + | + | + | + | + | - | + | + |
|                         |          | <i>flgA</i> | + | + | + | + | + | + | + | + | + | + | + | + | + |
|                         |          | <i>flgB</i> | + | + | + | - | + | + | + | + | + | + | - | + | + |
|                         |          | <i>flgC</i> | + | + | + | - | + | + | + | + | + | + | - | + | + |
|                         |          | <i>flgD</i> | + | + | + | + | + | + | + | + | + | + | + | + | + |
|                         |          | <i>flgE</i> | + | + | + | + | + | + | + | + | + | + | + | + | + |
| <i>flgF</i>             | +        | +           | + | + | + | + | + | + | + | + | + | + | + |   |   |
| <i>flgG</i>             | +        | +           | + | + | + | + | + | + | + | + | + | + | + |   |   |

|             |   |   |   |   |   |   |   |   |   |   |   |   |
|-------------|---|---|---|---|---|---|---|---|---|---|---|---|
| <i>flgH</i> | + | + | + | + | + | + | + | + | + | + | + | + |
| <i>flgI</i> | + | + | + | + | + | + | + | + | + | + | + | + |
| <i>flgJ</i> | + | + | + | + | + | + | + | + | + | + | + | + |
| <i>flgK</i> | + | + | + | + | + | + | + | + | + | + | + | + |
| <i>flgL</i> | + | + | + | + | + | + | + | + | + | + | + | + |
| <i>flgM</i> | + | + | + | - | + | - | - | + | + | - | + | - |
| <i>flgN</i> | + | + | + | - | + | + | + | + | + | - | + | + |
| <i>flhA</i> | + | + | + | + | + | + | + | + | + | + | + | + |
| <i>flhB</i> | + | + | + | + | + | + | + | + | + | + | + | + |
| <i>flhF</i> | + | + | + | + | + | + | + | + | + | + | + | + |
| <i>flhG</i> | + | + | + | + | + | + | + | + | + | + | + | + |
| <i>fliA</i> | + | + | + | + | + | + | + | + | + | + | + | + |
| <i>fliD</i> | + | + | + | + | + | + | + | + | + | + | + | + |
| <i>fliE</i> | + | + | + | - | + | + | + | + | + | + | + | + |
| <i>fliF</i> | + | + | + | + | + | + | + | + | + | + | + | + |
| <i>fliG</i> | - | + | + | + | + | + | + | + | + | + | + | + |
| <i>fliH</i> | + | + | + | + | + | + | + | + | + | + | + | + |
| <i>fliI</i> | + | + | + | + | + | + | + | + | + | + | + | + |
| <i>fliJ</i> | + | + | + | - | + | + | + | + | + | - | + | + |
| <i>fliK</i> | - | + | + | + | - | - | - | + | + | - | + | - |
| <i>fliL</i> | + | + | + | - | + | + | + | + | + | - | + | + |
| <i>fliN</i> | + | + | + | - | + | + | + | + | + | - | + | + |
| <i>fliO</i> | + | + | + | - | - | + | + | + | + | - | + | - |
| <i>fliP</i> | + | + | + | + | + | + | + | + | + | + | + | + |
| <i>fliQ</i> | + | + | + | - | + | + | + | + | + | + | + | + |
| <i>fliR</i> | + | + | + | + | + | + | + | + | + | + | + | + |

|             |                                                             |                           |             |   |   |   |   |   |   |   |   |   |   |   |   |
|-------------|-------------------------------------------------------------|---------------------------|-------------|---|---|---|---|---|---|---|---|---|---|---|---|
|             |                                                             | <i>fliS</i>               | +           | + | + | - | + | + | + | + | + | - | + | + |   |
|             |                                                             | <i>fliA</i>               | +           | + | + | + | + | + | + | + | + | + | + | + |   |
|             |                                                             | <i>fliB</i>               | +           | + | + | + | + | + | + | + | + | + | + | + |   |
|             |                                                             | <i>fliC</i>               | +           | + | + | + | + | + | + | + | + | + | + | + |   |
|             |                                                             | <i>motA</i>               | +           | + | + | + | + | + | + | + | + | + | + | + |   |
|             |                                                             | <i>motB</i>               | +           | + | + | + | + | + | + | + | + | + | + | + |   |
|             |                                                             | <i>motX</i>               | +           | + | + | + | + | + | + | + | + | + | + | + |   |
|             |                                                             | <i>motY</i>               | +           | + | + | + | + | + | + | + | + | + | + | + |   |
| Enzyme      | Metalloproteases                                            | <i>hap/vvp</i>            | -           | + | - | + | - | + | + | + | + | + | - | - |   |
|             | Neuraminidase                                               | <i>nanH</i>               | -           | - | - | + | - | - | - | + | - | + | - | - |   |
| Iron uptake | Enterobactin receptors                                      | <i>irgA</i>               | +           | - | + | + | - | + | + | + | + | + | + | + |   |
|             |                                                             | <i>vctA</i>               | +           | - | + | + | - | + | + | + | + | + | - | + |   |
|             |                                                             | <i>hasR</i>               | -           | - | - | - | + | - | - | + | - | - | - | - |   |
|             | Heme receptors                                              | <i>hutA</i>               | -           | + | + | + | + | + | + | + | + | + | + | + | - |
|             |                                                             | <i>hutR</i>               | -           | + | + | - | - | - | - | + | + | - | + | - |   |
|             |                                                             | <i>vctC</i>               | +           | + | + | + | + | + | + | + | + | + | + | + |   |
|             | Periplasmic binding protein-dependent ABC transport systems | <i>vctD</i>               | +           | + | + | + | + | + | + | + | + | + | + | + |   |
|             |                                                             | <i>vctG</i>               | +           | + | + | + | + | + | + | + | + | + | + | + |   |
|             |                                                             | <i>vctP</i>               | +           | + | + | + | + | + | + | + | + | + | + | + |   |
|             |                                                             | <i>viuC</i>               | +           | - | - | - | + | + | + | + | + | + | - | + |   |
|             |                                                             | <i>viuD</i>               | +           | - | - | - | - | + | + | + | + | + | - | - |   |
|             |                                                             | <i>viuG</i>               | +           | - | - | - | - | + | + | + | + | + | - | - |   |
|             |                                                             | <i>viuP</i>               | +           | - | - | - | - | + | + | + | + | + | - | - |   |
|             |                                                             | <i>vibA</i>               | +           | + | - | - | + | + | + | + | + | + | + | + |   |
|             |                                                             | Vibriobactin biosynthesis | <i>vibB</i> | + | + | - | - | + | + | + | + | + | + | + | + |
| <i>vibC</i> | +                                                           |                           | +           | - | - | + | + | + | + | + | + | + | + |   |   |

|                  |                              |             |   |   |   |   |   |   |   |   |   |   |   |   |
|------------------|------------------------------|-------------|---|---|---|---|---|---|---|---|---|---|---|---|
|                  |                              | <i>vibD</i> | - | + | - | - | - | - | - | + | + | - | - | - |
|                  |                              | <i>vibE</i> | + | + | - | - | + | + | + | + | + | + | + | + |
|                  |                              | <i>vibF</i> | - | + | - | - | - | - | - | + | + | - | - | - |
|                  |                              | <i>vibH</i> | - | + | - | - | - | - | - | + | + | - | - | - |
|                  | Vibriobactin utilization     | <i>viuA</i> | - | + | - | - | - | - | - | + | + | - | - | - |
|                  |                              | <i>viuB</i> | - | + | - | - | - | - | - | + | + | - | - | - |
|                  |                              | <i>barB</i> | - | - | - | - | - | - | - | - | - | + | + | - |
|                  | Acinetobactin                | <i>bauB</i> | - | - | - | - | - | - | - | - | - | + | + | - |
|                  |                              | <i>bauC</i> | - | - | - | - | - | - | - | - | - | + | + | - |
|                  |                              | <i>bauD</i> | - | - | - | - | - | - | - | - | - | + | + | - |
|                  |                              | <i>basG</i> | + | - | - | - | - | - | - | - | - | - | - | - |
|                  | Enterobactin transport       | <i>fepB</i> | - | - | - | - | - | - | - | - | - | - | + | - |
|                  |                              | <i>fepD</i> | - | - | - | - | - | - | - | - | - | - | + | - |
|                  |                              | <i>fepG</i> | - | - | - | - | + | - | - | - | - | - | - | - |
|                  | ABC transporter              | <i>fagA</i> | - | - | - | - | - | + | - | - | - | - | - | - |
|                  |                              | <i>fagB</i> | - | - | - | - | - | + | - | - | - | - | - | - |
| Quorum sensing   | Autoinducer-2                | <i>luxS</i> | + | + | + | - | + | + | + | + | + | - | + | + |
|                  | Cholerae autoinducer-1       | <i>cqsA</i> | - | - | + | + | + | + | + | + | + | + | + | + |
| Secretion system | EPS type II secretion system | <i>epsC</i> | + | + | + | + | + | + | + | + | + | + | + | + |
|                  |                              | <i>epsE</i> | + | + | + | + | + | + | + | + | + | + | + | + |
|                  |                              | <i>epsF</i> | + | + | + | + | + | + | + | + | + | + | + | + |
|                  |                              | <i>epsG</i> | + | + | + | - | + | + | + | + | + | - | + | + |
|                  |                              | <i>epsH</i> | + | + | + | - | + | + | + | + | + | + | + | + |
|                  |                              | <i>epsI</i> | + | + | + | - | + | + | + | + | + | - | + | + |
|                  |                              | <i>epsJ</i> | + | + | + | + | + | + | + | + | + | + | + | + |
|                  |                              | <i>epsK</i> | + | + | + | + | + | + | + | + | + | + | + | + |



|                          |              |             |   |   |   |   |   |   |   |   |   |   |   |   |  |
|--------------------------|--------------|-------------|---|---|---|---|---|---|---|---|---|---|---|---|--|
|                          | <i>epsL</i>  | +           | + | + | + | + | + | + | + | + | + | + | + | + |  |
|                          | <i>epsM</i>  | +           | + | + | - | - | + | + | + | + | - | + | + |   |  |
|                          | <i>epsN</i>  | +           | + | + | + | + | + | + | + | + | - | + | - |   |  |
|                          | <i>gspD</i>  | +           | + | + | + | + | + | + | + | + | + | + | + |   |  |
|                          | Undetermined | -           | - | + | - | - | - | - | - | - | - | - | - |   |  |
| T3SS1 secreted effectors | <i>vopQ</i>  | -           | - | + | - | - | - | - | - | - | - | + | - |   |  |
|                          | <i>vopR</i>  | -           | - | + | - | - | - | - | - | - | - | + | - |   |  |
|                          | <i>vopS</i>  | -           | - | + | - | - | - | - | - | - | - | + | - |   |  |
|                          | <i>sycN</i>  | -           | - | + | - | - | - | - | - | - | - | + | - |   |  |
|                          | <i>tyeA</i>  | -           | - | + | - | - | - | - | - | - | - | + | - |   |  |
|                          | <i>vcrD</i>  | -           | - | + | - | - | - | - | - | - | - | + | - |   |  |
|                          | <i>vcrG</i>  | -           | - | + | - | - | - | - | - | - | - | + | - |   |  |
|                          | <i>vcrH</i>  | -           | - | + | - | - | - | - | - | - | - | + | - |   |  |
|                          | <i>vcrR</i>  | -           | - | + | - | - | - | - | - | - | - | + | - |   |  |
|                          | <i>vcrV</i>  | -           | - | + | - | - | - | - | - | - | - | + | - |   |  |
|                          | <i>virF</i>  | -           | - | + | - | - | - | - | - | - | - | + | - |   |  |
|                          | T3SS1        | <i>virG</i> | - | - | + | - | - | - | - | - | - | - | + | - |  |
|                          |              | <i>vopB</i> | - | - | + | - | - | - | - | - | - | - | + | - |  |
|                          |              | <i>vopD</i> | - | - | + | - | - | - | - | - | - | - | + | - |  |
| <i>vopN</i>              |              | -           | - | + | - | - | - | - | - | - | - | + | - |   |  |
| <i>vscA</i>              |              | -           | - | + | - | - | - | - | - | - | - | + | - |   |  |
| <i>vscB</i>              |              | -           | - | + | - | - | - | - | - | - | - | + | - |   |  |
| <i>vscC</i>              |              | -           | - | + | - | - | - | - | - | - | - | + | - |   |  |
| <i>vscD</i>              |              | -           | - | + | - | - | - | - | - | - | - | + | - |   |  |
| <i>vscF</i>              |              | -           | - | + | - | - | - | - | - | - | - | + | - |   |  |
| <i>vscG</i>              |              | -           | - | + | - | - | - | - | - | - | - | + | - |   |  |



|       |                               |               |   |   |   |   |   |   |   |   |   |   |   |
|-------|-------------------------------|---------------|---|---|---|---|---|---|---|---|---|---|---|
|       |                               | Undetermined  | - | - | + | - | - | - | - | - | - | - | - |
|       |                               | Undetermined  | - | - | + | - | - | - | - | - | - | - | - |
|       |                               | <i>vcrD2</i>  | - | - | + | - | - | - | - | - | - | - | - |
|       |                               | <i>vscC2</i>  | - | - | + | - | - | - | - | - | - | - | - |
|       |                               | <i>vscN2</i>  | - | - | + | - | - | - | - | - | - | - | - |
|       |                               | <i>hcp-2</i>  | - | - | - | - | - | + | + | + | + | - | - |
|       | VAS effector proteins         | <i>vgrG-1</i> | - | - | - | - | - | - | - | + | + | + | - |
|       |                               | <i>vgrG-2</i> | - | - | - | + | - | + | + | + | + | + | - |
|       |                               | <i>vgrG-3</i> | - | - | - | + | - | - | + | + | + | + | - |
|       |                               | <i>vasA</i>   | - | - | - | + | - | + | + | + | + | + | - |
|       |                               | <i>vasB</i>   | - | - | - | + | - | + | + | + | + | + | - |
|       |                               | <i>vasC</i>   | - | - | - | + | - | + | + | + | + | + | - |
|       |                               | <i>vasD</i>   | - | - | - | - | - | + | + | + | + | - | - |
|       |                               | <i>vasE</i>   | - | - | - | + | - | + | + | + | + | + | - |
|       | VAS type VI secretion system  | <i>vasF</i>   | - | - | - | + | - | + | + | + | + | + | - |
|       |                               | <i>vasG</i>   | - | - | - | + | - | + | + | + | + | + | - |
|       |                               | <i>vasH</i>   | - | - | - | + | - | + | + | + | + | + | - |
|       |                               | <i>vasI</i>   | - | - | - | + | - | + | + | + | + | + | - |
|       |                               | <i>vasJ</i>   | - | - | - | + | - | + | + | + | + | + | - |
|       |                               | <i>vasK</i>   | - | - | - | + | - | + | + | + | + | + | - |
|       | T4SS effectors                | Undetermined  | - | - | - | - | - | - | - | - | - | - | + |
|       | Accessory cholera enterotoxin | <i>ace</i>    | - | - | - | - | - | - | - | + | + | - | - |
|       | Cholera toxin                 | <i>ctxA</i>   | - | - | - | - | - | - | - | + | + | - | - |
| Toxin | Hemolysin/cytolysin           | <i>vvhA</i>   | - | + | - | - | - | - | - | - | - | - | - |
|       | RTX toxin                     | <i>rtxA</i>   | - | + | - | - | - | - | - | + | + | + | - |
|       |                               | <i>rtxB</i>   | - | + | - | - | - | - | - | + | + | + | - |

|                         |                                          |                  |   |   |   |   |   |   |   |   |   |   |   |   |
|-------------------------|------------------------------------------|------------------|---|---|---|---|---|---|---|---|---|---|---|---|
|                         |                                          | <i>rtxC</i>      | - | + | - | - | - | - | - | + | + | - | - | - |
|                         |                                          | <i>rtxD</i>      | - | + | - | - | - | - | - | + | + | + | - | - |
|                         |                                          | <i>rtxE</i>      | - | + | - | - | - | - | - | - | - | - | - | - |
|                         | Thermolabile hemolysin                   | <i>tlh</i>       | - | + | + | + | + | + | + | + | + | + | + | - |
|                         | Thermostable direct hemolysin            | <i>tdh</i>       | - | - | + | - | - | - | - | - | - | - | - | - |
|                         | V.cholerae cytolysin                     | <i>hlyA</i>      | - | - | - | + | + | + | + | + | + | + | - | - |
|                         | Zona occludens toxin                     | <i>zot</i>       | - | - | - | - | - | - | - | + | + | - | - | - |
|                         | Phytotoxin coronatine                    | Undetermined     | - | - | - | - | - | + | + | - | - | - | + | - |
| Others                  | O-antigen                                | Undetermined     | + | - | - | - | - | - | - | - | - | + | - | - |
|                         |                                          | <i>manB</i>      | - | - | - | - | - | + | + | - | - | - | - | + |
|                         |                                          | <i>lgtF</i>      | + | - | - | - | + | + | + | - | - | - | - | + |
|                         |                                          | <i>kdkA</i>      | - | - | - | - | + | + | + | - | - | - | - | - |
| Endotoxin               | LOS                                      | <i>lpxK</i>      | - | - | - | - | + | - | - | - | - | + | - | - |
|                         |                                          | <i>opsX/rfaC</i> | + | - | - | - | + | - | - | - | - | - | - | - |
|                         |                                          | <i>rfaF</i>      | - | - | - | - | + | - | - | - | - | - | - | - |
|                         | LPS                                      | <i>bplA</i>      | - | - | - | - | - | - | - | - | - | + | - | - |
| Immune evasion          | Capsule                                  | Undetermined     | - | + | - | + | + | + | + | - | - | + | + | - |
| Invasion                | Flagella                                 | <i>cheB2</i>     | + | - | - | - | + | + | - | - | - | + | - | + |
|                         |                                          | Undetermined     | - | - | - | - | + | - | - | - | - | + | + | - |
| Iron acquisition        | Ent siderophore                          | Undetermined     | - | - | - | - | + | - | - | - | - | - | - | - |
|                         |                                          | <i>fepG</i>      | - | - | - | - | - | - | - | - | - | - | + | - |
| Biofilm formation       | AdeFGH efflux pump/transport autoinducer | <i>adeG</i>      | - | - | - | - | - | - | - | - | - | - | + | - |
| Cell surface components | Trehalose-recycling ABC transporter      | <i>sugC</i>      | - | - | - | - | - | + | - | - | - | - | - | + |

|                       |                      |              |   |   |   |   |   |   |   |   |   |   |   |   |   |
|-----------------------|----------------------|--------------|---|---|---|---|---|---|---|---|---|---|---|---|---|
| Regulation            | Two-component system | <i>bvgA</i>  | - | - | - | - | - | - | - | - | - | - | - | - | + |
|                       |                      | <i>bfmR</i>  | + | - | - | - | + | - | - | - | - | - | - | - | - |
| Anaerobic respiration | Nitrate reductase    | <i>narH</i>  | - | - | - | - | - | - | + | - | - | - | - | - | - |
| Efflux pump           | AcrAB                | Undetermined | - | - | - | - | - | - | + | - | - | - | - | - | - |
|                       |                      | <i>acrB</i>  | - | - | - | - | - | + | - | - | - | - | - | - | - |

30 Note: A. *Vibrio fujianensis* FJ201301<sup>T</sup>; B. *Vibrio vulnificus* ATCC 27562<sup>T</sup> ; C. *Vibrio parahaemolyticus* RIMD 2210633<sup>T</sup>; D. *Vibrio mimicus* NCTC 11435<sup>T</sup>;  
31 E. *Vibrio metschnikovii* JCM 21189<sup>T</sup>; F. *Vibrio furnissii* NCTC 13120<sup>T</sup>; G. *Vibrio fluvialis* ATCC 33809<sup>T</sup>; H. *Vibrio cholerae* O1 biovar El Tor N16961<sup>T</sup>; I.  
32 *Vibrio cholerae* O139 serovar MO45; J. *Vibrio anguillarum* NCTC 12159<sup>T</sup>; K. *Vibrio alginolyticus* ATCC 17749<sup>T</sup>; L. *Vibrio cincinnatiensis* NCTC 12012<sup>T</sup>
